# Supplementary material
Source: Springer Nature journal article supplement (https://www.springermedizin.de/resource/supplementary/12879_2010_1726_MOESM1_ESM.pdf/9443106)
Supplement: MOESM1 [file 9443106]

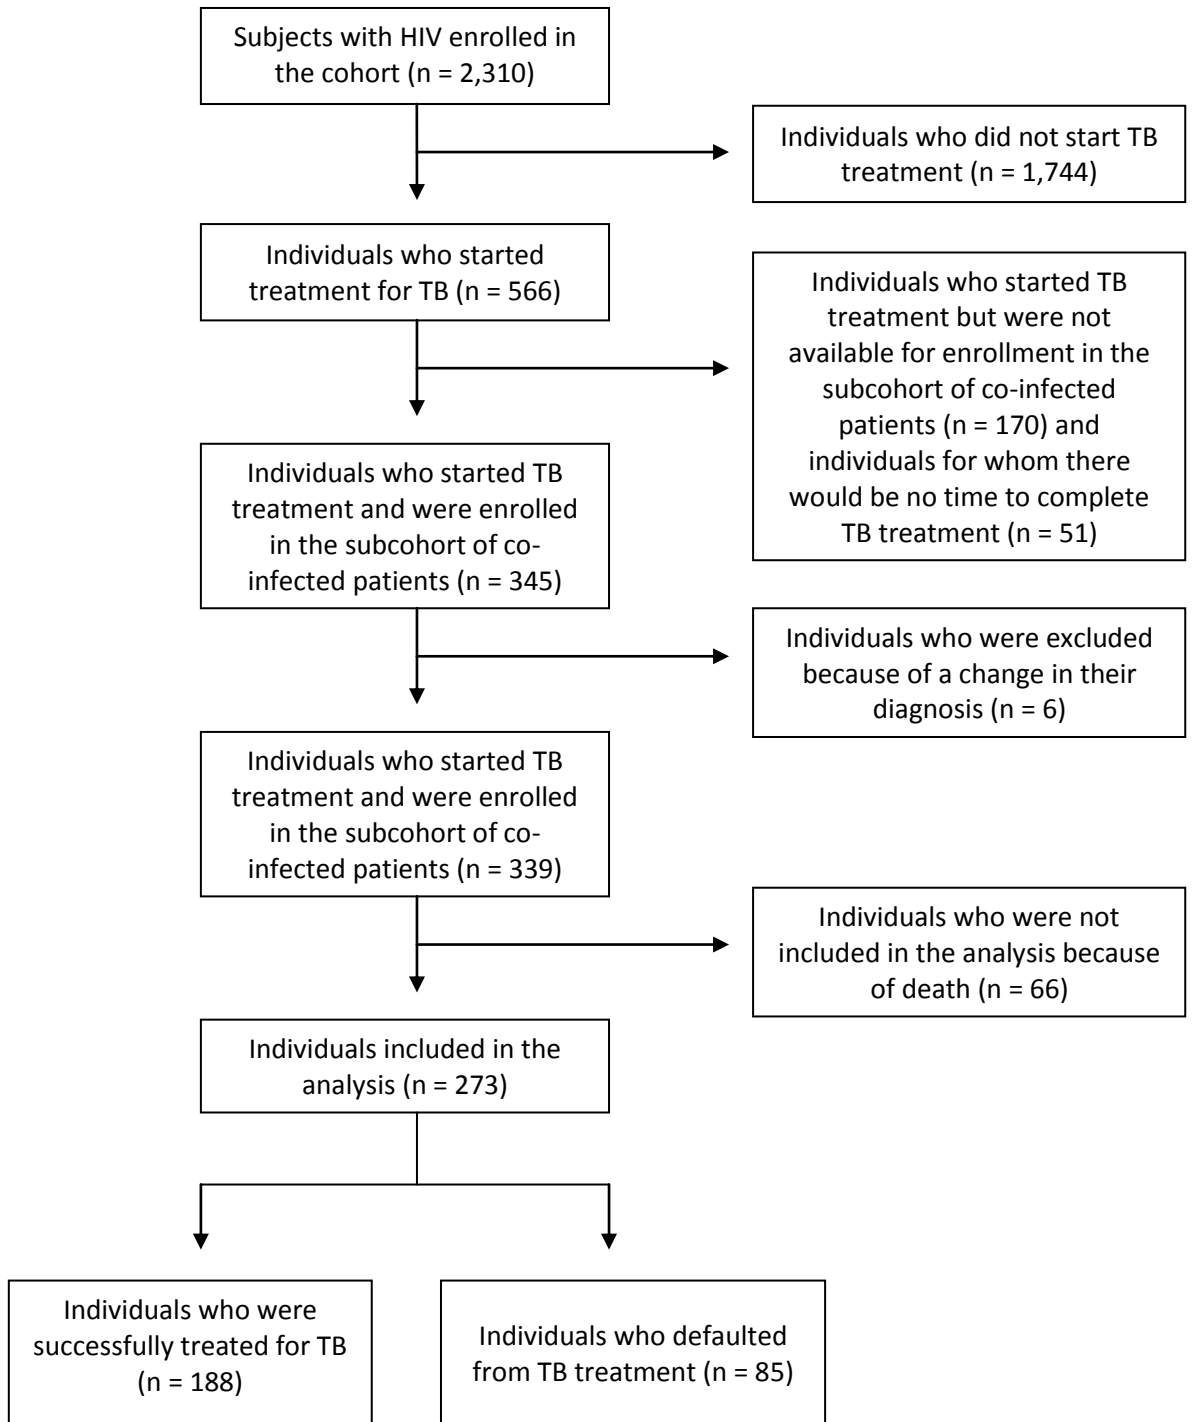

**Figure 1**

**Algorithm for the selection of individuals for the study of risk factors for default from tuberculosis (TB) treatment in Human Immunodeficiency Virus (HIV) infected patients in the State of Pernambuco, 2007–2009.**
